# Supplementary material for: Health-related quality of life among breast cancer patients compared to cancer survivors and age-matched women in the general population in Vietnam
Source: PubMed Central journal article supplement (PMC8921138; doi:10.1007/s11136-021-02997-w), 2021-09-20
Supplement: 11136_2021_2997_MOESM3_ESM.pdf [file 11136_2021_2997_MOESM3_ESM.pdf]

**Table S1 Sample characteristics, compared between online survey and hospital-based survey**

| Characteristics                                                           | Online survey<br>n (%) | Hospital-based survey<br>n (%) | p-value* | Total<br>n (%) | National data<br>% |
|---------------------------------------------------------------------------|------------------------|--------------------------------|----------|----------------|--------------------|
| <b>Total</b>                                                              | 209 (67.6)             | 100 (32.4)                     |          | 309 (100.0)    |                    |
| <b>Age, mean (range)</b>                                                  | 46 (28-69)             | 52 (31-86)                     | <0.001   | 48 (28-86)     | NA                 |
| <b>Residence area: urban</b>                                              | 173 (86.1)             | 38 (38.0)                      | <0.001   | 211 (70.1)     | 35.0 <sup>b</sup>  |
| <b>High education level (completed at least high school)</b>              | 199 (96.1)             | 38 (38.0)                      | <0.001   | 237 (77.2)     | 20.8 <sup>a</sup>  |
| <b>Occupation (employee or wage worker)</b>                               | 115 (56.1)             | 18 (18.0)                      | <0.05    | 133 (43.6)     | 45.0 <sup>c</sup>  |
| <b>Household monthly income</b>                                           |                        |                                |          |                |                    |
| ≤ 3,000,000 VND (~£100)                                                   | 13 (6.6)               | 30 (30.3)                      | <0.001   | 43 (14.5)      | NA                 |
| 3,000,001 – 6,000,000 VND (~£100-200)                                     | 31 (15.7)              | 26 (26.2)                      |          | 57 (19.9)      |                    |
| 6,000,001 – 9,000,000 VND (~£200-300)                                     | 19 (9.6)               | 12 (12.1)                      |          | 31 (10.4)      |                    |
| 9,000,001 – 12,000,000 VND (~£300-400)                                    | 55 (27.8)              | 20 (20.2)                      |          | 75 (25.3)      |                    |
| > 12,000,000 VND (~£400)                                                  | 80 (40.4)              | 11 (11.1)                      |          | 91 (30.6)      |                    |
| <b>Completion status of treatment</b>                                     |                        |                                |          |                |                    |
| No (Patient)                                                              | 45 (21.5)              | 55 (55.0)                      | <0.001   | 100 (32.4)     | NA                 |
| Yes (Survivor)                                                            | 164 (78.5)             | 45 (45.0)                      |          | 209 (67.6)     |                    |
| <b>Stage of breast cancer at diagnosis: Late stage (Stage III and IV)</b> | 28 (13.4)              | 15 (15.0)                      | NS       | 43 (13.9)      | 49.5 <sup>d</sup>  |

\* Results of Chi-square tests compared between two administrative types of the survey

<sup>a</sup> Data are from Vietnam Population and Housing Census 2009<sup>1</sup>

<sup>b</sup> Data are from Statistical Summary Book of Vietnam 2017<sup>2</sup>

<sup>c</sup> Data are from 2018 report of the Ministry of Labour – Invalids and Social Affairs<sup>3</sup>

<sup>d</sup> Data from the 5 biggest oncology hospitals in Vietnam (2009)<sup>4</sup>

NA: Data not available/not applicable | NS: not significant

VND: Vietnamese Dong. Exchange rate in October 2020: £1 ~ 30,000 VND

<sup>1</sup> Vietnam General Statistics Office, Central Population and Housing Census Steering Committee. Vietnam Population and Housing Census 2009. Hanoi, Vietnam; 2009.

<sup>2</sup> General Statistics Office of Vietnam. Statistical summary book of Vietnam 2017. Hanoi, Vietnam: Statistical Publishing House; 2017. 424 p.

<sup>3</sup> Ministry of Labour – Invalids and Social Affairs. Decision No. 1052/QĐ-LĐTBXH: Announcement of the results of 2018 poor and near-poor household survey. Hanoi, Vietnam. 2019.

<sup>4</sup> Thuan TV, Anh PT, Tu DV, Huong TTT. Cancer control in Vietnam: Where are we. Cancer care in emerging health systems [Internet]. 2016. Available from: <http://www.cancercontrol.info/cc2016/cancer-control-in-vietnam-where-we-are/>.
