# Supplementary material for: Health-related quality of life among breast cancer patients compared to cancer survivors and age-matched women in the general population in Vietnam
Source: Springer Nature journal article supplement (doi:10.1007/s11136-021-02997-w), 2021-09-19
Supplement: MOESM2 [file 19677196]

**Results from ordinary least square (OLS) regression models in relation to the assessment of the determinants of EQ-VAS and utility scores**

| Variable                                        | EQ-VAS score                  |                     |                               |                     | Utility score                 |                      |                               |                      |
|-------------------------------------------------|-------------------------------|---------------------|-------------------------------|---------------------|-------------------------------|----------------------|-------------------------------|----------------------|
|                                                 | Model 1 <sup>a</sup><br>n=287 |                     | Model 2 <sup>b</sup><br>n=306 |                     | Model 1 <sup>a</sup><br>n=288 |                      | Model 2 <sup>b</sup><br>n=296 |                      |
|                                                 | β coeff                       | 95% CI              | β coeff                       | 95% CI              | β coeff                       | 95% CI               | β coeff                       | 95% CI               |
| <b>Treatment status</b>                         |                               |                     |                               |                     |                               |                      |                               |                      |
| Patient <sup>ref</sup>                          |                               |                     |                               |                     |                               |                      |                               |                      |
| Survivor                                        | <b>9.3*</b>                   | <b>4.4 – 14.2</b>   | <b>9.0*</b>                   | <b>4.3 – 13.6</b>   | <b>0.06*</b>                  | <b>0.01 – 0.11</b>   | <b>0.07*</b>                  | <b>0.02 – 0.11</b>   |
| <b>Age group, years</b>                         |                               |                     |                               |                     |                               |                      |                               |                      |
| <40 <sup>ref</sup>                              |                               |                     |                               |                     |                               |                      |                               |                      |
| 40-49                                           | -0.1                          | -5.2 – 5.0          | -0.6                          | -5.4 – 4.2          | -0.05                         | -0.09 – 0.00         | -0.04                         | -0.09 – 0.00         |
| 50-59                                           | -4.5                          | -10.9 – 1.8         | -4.8                          | -10.6 – 1.0         | -0.04                         | -0.10 – 0.02         | -0.04                         | -0.09 – 0.02         |
| 60+                                             | <b>-9.4*</b>                  | <b>-17.1 – -1.6</b> | <b>-9.2*</b>                  | <b>-16.3 – -2.1</b> | <b>-0.11*</b>                 | <b>-0.18 – -0.03</b> | <b>-0.10*</b>                 | <b>-0.17 – -0.03</b> |
| <b>Residence</b>                                |                               |                     |                               |                     |                               |                      |                               |                      |
| Rural <sup>ref</sup>                            |                               |                     |                               |                     |                               |                      |                               |                      |
| Urban                                           | 1.2                           | -4.3 – 6.6          |                               |                     | 0.03                          | -0.02 – 0.09         |                               |                      |
| <b>Education level</b>                          |                               |                     |                               |                     |                               |                      |                               |                      |
| Completed up to secondary school <sup>ref</sup> |                               |                     |                               |                     |                               |                      |                               |                      |
| Completed high school                           | 4.7                           | -3.5 – 12.8         | 5.8                           | -1.2 – 12.9         | 0.05                          | -0.03 – 0.14         | 0.06                          | -0.02 – 0.15         |
| Completed graduate                              | 5.8                           | -1.3 – 12.9         | <b>7.8*</b>                   | <b>2.1 – 13.5</b>   | 0.06                          | -0.01 – 0.13         | <b>0.08*</b>                  | <b>0.01 – 0.15</b>   |
| Completed postgraduate                          | 7.4                           | -4.0 – 18.9         | <b>9.6*</b>                   | <b>0.4 – 18.8</b>   | 0.10                          | -0.00 – 0.19         | <b>0.12*</b>                  | <b>0.02 – 0.21</b>   |
| <b>Marital status</b>                           |                               |                     |                               |                     |                               |                      |                               |                      |
| Single/separated/divorce/widow <sup>ref</sup>   |                               |                     |                               |                     |                               |                      |                               |                      |
| Married                                         | -1.3                          | -6.9 – 4.2          |                               |                     | 0.1                           | -0.01 – 0.07         |                               |                      |
| <b>Household monthly income</b>                 |                               |                     |                               |                     |                               |                      |                               |                      |
| ≤ 3,000,000 VND (~£100) <sup>ref</sup>          |                               |                     |                               |                     |                               |                      |                               |                      |
| 3,000,001 – 6,000,000 VND (~£100-200)           | 2.0                           | -6.7 – 10.6         |                               |                     | 0.04                          | -0.06 – 0.14         | 0.04                          | -0.06 – 0.14         |
| 6,000,001 – 9,000,000 VND (~£200-300)           | 3.8                           | -5.2 – 12.9         |                               |                     | 0.07                          | -0.03 – 0.17         | 0.07                          | -0.03 – 0.17         |
| 9,000,001 – 12,000,000 VND (~£300-400)          | 2.4                           | -6.4 – 11.2         |                               |                     | 0.09                          | -0.01 – 0.18         | <b>0.09*</b>                  | <b>0.00 – 0.18</b>   |
| > 12,000,000 VND (~£400)                        | 3.0                           | -5.8 – 11.7         |                               |                     | 0.08                          | -0.02 – 0.17         | 0.08                          | -0.01 – 0.17         |
| <b>AIC</b>                                      | <b>2461</b>                   |                     | <b>2603</b>                   |                     | <b>-186.5</b>                 |                      | <b>-201.6</b>                 |                      |
| <b>BIC</b>                                      | <b>2513</b>                   |                     | <b>2632</b>                   |                     | <b>-135.2</b>                 |                      | <b>-157.3</b>                 |                      |

<sup>a</sup> Model with all exploratory variables | <sup>b</sup> Model included only variables with significant coefficients (Backward elimination)

β coeff: Beta coefficients of the Tobit model | <sup>ref</sup>: Reference group | \* p < 0.05 versus reference group

VND: Vietnamese Dong. Exchange rate in October 2020: £1 ~ 30,000 VND

## Results from generalized linear models (GLM) in relation to the assessment of the determinants of EQ-VAS and utility scores

| Variable                                        | EQ-VAS score                    |                     |                                 |                     | Utility score                   |                      |                                 |                      |
|-------------------------------------------------|---------------------------------|---------------------|---------------------------------|---------------------|---------------------------------|----------------------|---------------------------------|----------------------|
|                                                 | Model 1 <sup>a †</sup><br>n=287 |                     | Model 2 <sup>b †</sup><br>n=306 |                     | Model 1 <sup>a §</sup><br>n=288 |                      | Model 2 <sup>b §</sup><br>n=296 |                      |
|                                                 | β coeff                         | 95% CI              | β coeff                         | 95% CI              | β coeff                         | 95% CI               | β coeff                         | 95% CI               |
| <b>Treatment status</b>                         |                                 |                     |                                 |                     |                                 |                      |                                 |                      |
| Patient <sup>ref</sup>                          |                                 |                     |                                 |                     |                                 |                      |                                 |                      |
| Survivor                                        | <b>9.3*</b>                     | <b>4.8 – 13.8</b>   | <b>9.0*</b>                     | <b>4.8 – 13.2</b>   | <b>0.08*</b>                    | <b>0.02 – 0.14</b>   | <b>0.08*</b>                    | <b>0.02 – 0.14</b>   |
| <b>Age group, years</b>                         |                                 |                     |                                 |                     |                                 |                      |                                 |                      |
| <40 <sup>ref</sup>                              |                                 |                     |                                 |                     |                                 |                      |                                 |                      |
| 40-49                                           | -0.1                            | -5.7 – 5.5          | -0.6                            | -5.7 – 4.6          | -0.05                           | -0.10 – 0.00         | -0.05                           | -0.10 – 0.00         |
| 50-59                                           | -4.5                            | -10.7 – 1.6         | -4.8                            | -10.5 – 0.9         | -0.05                           | -0.11 – 0.02         | -0.04                           | -0.11 – 0.02         |
| 60+                                             | <b>-9.4*</b>                    | <b>-16.3 – -2.4</b> | <b>-9.2*</b>                    | <b>-15.6 – -2.8</b> | <b>-0.13*</b>                   | <b>-0.22 – -0.03</b> | <b>-0.12*</b>                   | <b>-0.21 – -0.04</b> |
| <b>Residence</b>                                |                                 |                     |                                 |                     |                                 |                      |                                 |                      |
| Rural <sup>ref</sup>                            |                                 |                     |                                 |                     |                                 |                      |                                 |                      |
| Urban                                           | 1.2                             | -4.1 – 6.4          |                                 |                     | 0.03                            | -0.03 – 0.10         |                                 |                      |
| <b>Education level</b>                          |                                 |                     |                                 |                     |                                 |                      |                                 |                      |
| Completed up to secondary school <sup>ref</sup> |                                 |                     |                                 |                     |                                 |                      |                                 |                      |
| Completed high school                           | 4.7                             | -2.3 – 11.6         | 5.8                             | -0.2 – 11.9         | 0.08                            | -0.03 – 0.19         | 0.09                            | -0.12 – 0.20         |
| Completed graduate                              | 5.8                             | -1.1 – 12.7         | <b>7.8*</b>                     | <b>2.7 – 13.0</b>   | 0.09                            | -0.04 – 0.22         | <b>0.11*</b>                    | <b>0.02 – 0.20</b>   |
| Completed postgraduate                          | 7.4                             | -3.3 – 18.1         | <b>9.6*</b>                     | <b>0.8 – 18.4</b>   | <b>0.13*</b>                    | <b>0.01 – 0.25</b>   | <b>0.15*</b>                    | <b>0.04 – 0.26</b>   |
| <b>Marital status</b>                           |                                 |                     |                                 |                     |                                 |                      |                                 |                      |
| Single/separated/divorce/widow <sup>ref</sup>   |                                 |                     |                                 |                     |                                 |                      |                                 |                      |
| Married                                         | -1.3                            | -6.7 – 4.0          |                                 |                     | 0.03                            | -0.03 – 0.09         |                                 |                      |
| <b>Household monthly income</b>                 |                                 |                     |                                 |                     |                                 |                      |                                 |                      |
| ≤ 3,000,000 VND (~£100) <sup>ref</sup>          |                                 |                     |                                 |                     |                                 |                      |                                 |                      |
| 3,000,001 – 6,000,000 VND (~£100-200)           | 2.0                             | -5.4 – 9.3          |                                 |                     | 0.06                            | -0.08 – 0.19         | 0.06                            | -0.07 – 0.19         |
| 6,000,001 – 9,000,000 VND (~£200-300)           | 3.8                             | -5.1 – 12.8         |                                 |                     | 0.09                            | -0.04 – 0.22         | 0.09                            | -0.03 – 0.22         |
| 9,000,001 – 12,000,000 VND (~£300-400)          | 2.4                             | -5.5 – 10.4         |                                 |                     | 0.11                            | -0.01 – 0.23         | 0.11                            | -0.01 – 0.23         |
| > 12,000,000 VND (~£400)                        | 3.0                             | -4.9 – 10.9         |                                 |                     | 0.09                            | -0.03 – 0.21         | 0.10                            | -0.02 – 0.22         |
| <b>AIC</b>                                      | <b>2461</b>                     |                     | <b>2602</b>                     |                     | <b>-184.0</b>                   |                      | <b>-199.9</b>                   |                      |
| <b>BIC</b>                                      | <b>2513</b>                     |                     | <b>2632</b>                     |                     | <b>-132.7</b>                   |                      | <b>-155.6</b>                   |                      |

<sup>a</sup> Model with all exploratory variables | <sup>b</sup> Model included only variables with significant coefficients (Backward elimination)

† Family: Gaussian, Link: identity | § Family: Gaussian, Link: log

β coeff: Beta coefficients of the Tobit model | <sup>ref</sup>: Reference group | \* p < 0.05 versus reference group

VND: Vietnamese Dong. Exchange rate in October 2020: £1 ~ 30,000 VND
